# Supplementary material for: Substituent effects on the stability, physicochemical properties and chemical reactivity of nitroimidazole derivatives with potential antiparasitic effect: a computational study
Source: Royal Society of Chemistry journal article supplement (doi:10.1039/c9nj02207d), 2019-01-01
Supplement: c9nj02207d1.pdf [file c9nj02207d1.pdf]

## New Journal of Chemistry

Manuscript ID: NJ-ART-04-2019-002207.R1

### Supporting Information

Substituent effects on the stability, physicochemical properties and chemical reactivity of nitroimidazole derivatives with potential antiparasitic effect: A computational study

Linda Campos-Fernández<sup>a,d,e</sup>, Carolina Barrientos-Salcedo<sup>b</sup>, Edtson E. Herrera Valencia<sup>c</sup>, Rocío Ortiz-Muñoz<sup>d</sup> and Catalina Soriano-Correa<sup>a,\*</sup>

Table S1A. Geometric parameters obtained for 2-nitroimidazoles and 5-nitromidazoles at the M06-2X/6-311+G(d,p) level of theory.

| Param. Geom.                                                | BNZ <sup>a</sup> X-ray | BNZ     | M-1     | M-2     | M-3     | M-4     | M-5     | M-6     | M-7    | M-8     | M-9     | DMZ <sup>b</sup> X-ray |
|-------------------------------------------------------------|------------------------|---------|---------|---------|---------|---------|---------|---------|--------|---------|---------|------------------------|
| N <sub>1</sub> -C <sub>2</sub>                              | 1.362                  | 1.360   | 1.349   | 1.360   | 1.341   | 1.349   | 1.372   | 1.354   | 1.347  | 1.345   | 1.350   | 1.335                  |
| C <sub>2</sub> -N <sub>3</sub>                              | 1.314                  | 1.310   | 1.307   | 1.309   | 1.328   | 1.323   | 1.308   | 1.317   | 1.326  | 1.336   | 1.338   | 1.330                  |
| N <sub>3</sub> -C <sub>4</sub>                              | 1.362                  | 1.358   | 1.362   | 1.358   | 1.357   | 1.358   | 1.369   | 1.363   | 1.355  | 1.354   | 1.349   | 1.353                  |
| N <sub>1</sub> -C <sub>5</sub>                              | 1.358                  | 1.361   | 1.357   | 1.360   | 1.367   | 1.381   | 1.385   | 1.390   | 1.380  | 1.370   | 1.380   | 1.381                  |
| C <sub>2</sub> -N <sub>6</sub>                              | 1.434                  | 1.432   | 1.432   | 1.432   | -       | -       | -       | -       | -      | -       | -       | -                      |
| C <sub>5</sub> -N <sub>6</sub>                              | --                     | -       | -       | -       | 1.410   | 1.414   | 1.423   | 1.415   | 1.413  | 1.404   | 1.406   | 1.410                  |
| N <sub>6</sub> -O <sub>7</sub>                              | 1.232                  | 1.215   | 1.214   | 1.215   | 1.221   | 1.221   | 1.217   | 1.218   | 1.220  | 1.223   | 1.225   | 1.225                  |
| N <sub>1</sub> -R                                           | 1.463                  | 1.455   | 1.015   | 1.456   | 1.015   | 1.459   | 1.424   | 1.382   | 1.458  | 1.015   | 1.465   | -                      |
| N <sub>1</sub> C <sub>2</sub> N <sub>3</sub>                | -                      | 113.84  | 113.87  | 113.79  | 112.31  | 113.04  | 112.34  | 112.14  | 113.05 | 111.22  | 112.00  | 112.1                  |
| N <sub>1</sub> C <sub>5</sub> C <sub>4</sub>                | 106.76                 | 106.61  | 105.81  | 106.63  | 107.26  | 107.26  | 107.18  | 106.40  | 107.35 | 106.99  | 107.41  | 107.6                  |
| C <sub>2</sub> N <sub>1</sub> C <sub>5</sub>                | 104.99                 | 104.99  | 105.92  | 105.01  | 105.84  | 104.90  | 104.86  | 105.67  | 104.87 | 106.52  | 105.32  | 104.9                  |
| C <sub>2</sub> N <sub>1</sub> R                             | 130.67                 | 129.85  | 126.41  | 129.93  | 127.58  | 124.49  | 124.76  | 122.73  | 125.25 | 127.07  | 126.00  | 125.0                  |
| C <sub>5</sub> N <sub>1</sub> R                             | 124.17                 | 124.51  | 127.67  | 124.55  | 126.58  | 130.32  | 126.86  | 130.28  | 129.73 | 126.41  | 128.65  | 130.0                  |
| O <sub>7</sub> N <sub>6</sub> O <sub>8</sub>                | 124.07                 | 124.21  | 124.65  | 124.21  | 124.12  | 123.90  | 124.75  | 124.39  | 123.96 | 123.82  | 123.34  | 123.0                  |
| C <sub>2</sub> N <sub>3</sub> C <sub>4</sub> C <sub>5</sub> | 0.00                   | -0.11   | 0.00    | 0.04    | -0.01   | -0.28   | 0.75    | 0.40    | 0.10   | 0.07    | 0.16    | -                      |
| N <sub>3</sub> C <sub>4</sub> C <sub>5</sub> N <sub>1</sub> | -0.46                  | -0.73   | -0.00   | -0.82   | -0.04   | -0.40   | -2.15   | -1.60   | 0.26   | 0.10    | 0.04    | -                      |
| C <sub>4</sub> N <sub>3</sub> C <sub>2</sub> N <sub>1</sub> | 0.48                   | 0.96    | 0.00    | 0.78    | 0.06    | 0.90    | 0.99    | 1.02    | -0.44  | -0.23   | -0.31   | -                      |
| RN <sub>1</sub> C <sub>2</sub> N <sub>3</sub>               | -176.13                | -172.31 | 180.00  | -173.15 | 179.93  | -175.44 | -162.25 | -170.10 | 176.49 | -179.81 | 178.39  | -                      |
| RN <sub>1</sub> C <sub>5</sub> C <sub>4</sub>               | 176.45                 | 172.75  | -180.00 | 173.63  | -179.95 | 174.73  | 162.02  | 169.00  | 176.14 | 179.87  | -178.21 | -                      |
| O <sub>8</sub> N <sub>6</sub> C <sub>2</sub> N <sub>1</sub> | -5.0                   | 0.99    | 0.00    | 1.54    | -       | -       | -       | -       | -      | -       | -       | -                      |
| O <sub>8</sub> N <sub>6</sub> C <sub>5</sub> N <sub>1</sub> | -                      | -       | -       | -       | 179.92  | -0.90   | -12.45  | -9.99   | 176.07 | 0.74    | -172.94 | -                      |

Values of the bond lengths are given in angstroms (Å); dihedral angles are given in degrees (°). a) X-ray parameters were taken from Refs: a) [60]; b) [61].

Table S1B. Geometric parameters obtained for 5-nitromidazoles at the M06-2X/6-311+G(d,p) level of theory.

| Param. Geom.                                                | M-10    | M-11    | M-12    | M-13    | M-14    | M-15    | M-16    | M-17    | M-18    | M-19    | M-20    | M-21    | M-22    |
|-------------------------------------------------------------|---------|---------|---------|---------|---------|---------|---------|---------|---------|---------|---------|---------|---------|
| N <sub>1</sub> -C <sub>2</sub>                              | 1.354   | 1.353   | 1.353   | 1.364   | 1.353   | 1.355   | 1.364   | 1.368   | 1.371   | 1.356   | 1.355   | 1.362   | 1.354   |
| C <sub>2</sub> -N <sub>3</sub>                              | 1.333   | 1.334   | 1.334   | 1.325   | 1.335   | 1.335   | 1.323   | 1.324   | 1.321   | 1.327   | 1.334   | 1.325   | 1.333   |
| N <sub>3</sub> -C <sub>4</sub>                              | 1.352   | 1.352   | 1.352   | 1.360   | 1.350   | 1.351   | 1.360   | 1.359   | 1.361   | 1.358   | 1.351   | 1.359   | 1.352   |
| N <sub>1</sub> -C <sub>5</sub>                              | 1.382   | 1.382   | 1.383   | 1.384   | 1.383   | 1.384   | 1.392   | 1.385   | 1.386   | 1.390   | 1.383   | 1.391   | 1.382   |
| C <sub>5</sub> -N <sub>6</sub>                              | 1.408   | 1.407   | 1.407   | 1.414   | 1.408   | 1.409   | 1.410   | 1.413   | 1.414   | 1.410   | 1.409   | 1.410   | 1.408   |
| N <sub>6</sub> -O <sub>7</sub>                              | 1.223   | 1.223   | 1.224   | 1.223   | 1.225   | 1.224   | 1.219   | 1.219   | 1.218   | 1.220   | 1.224   | 1.219   | 1.222   |
| N <sub>1</sub> -R                                           | 1.451   | 1.452   | 1.454   | 1.457   | 1.467   | 1.465   | 1.379   | 1.439   | 1.431   | 1.368   | 1.468   | 1.384   | 1.450   |
| N <sub>1</sub> C <sub>2</sub> N <sub>3</sub>                | 111.75  | 111.85  | 111.86  | 111.96  | 112.00  | 112.03  | 110.64  | 111.05  | 110.94  | 110.78  | 112.07  | 110.73  | 111.73  |
| N <sub>1</sub> C <sub>5</sub> C <sub>4</sub>                | 107.18  | 107.23  | 107.23  | 107.39  | 107.26  | 107.30  | 106.09  | 106.78  | 106.71  | 105.96  | 107.34  | 106.17  | 107.15  |
| C <sub>2</sub> N <sub>1</sub> C <sub>5</sub>                | 105.52  | 105.50  | 105.42  | 105.11  | 105.30  | 105.19  | 106.48  | 105.87  | 105.91  | 106.71  | 105.16  | 106.45  | 105.52  |
| C <sub>2</sub> N <sub>1</sub> R                             | 126.00  | 125.71  | 125.75  | 122.94  | 124.97  | 124.65  | 123.58  | 123.80  | 124.06  | 124.97  | 124.83  | 123.65  | 126.04  |
| C <sub>5</sub> N <sub>1</sub> R                             | 128.23  | 128.31  | 128.38  | 128.81  | 129.40  | 128.50  | 129.37  | 129.84  | 129.28  | 128.32  | 128.60  | 129.21  | 128.18  |
| O <sub>7</sub> N <sub>6</sub> O <sub>8</sub>                | 123.57  | 123.48  | 123.46  | 123.72  | 123.34  | 123.44  | 124.07  | 124.37  | 124.49  | 123.73  | 123.44  | 123.99  | 123.58  |
| C <sub>2</sub> N <sub>3</sub> C <sub>4</sub> C <sub>5</sub> | 0.03    | 0.08    | -0.03   | 0.06    | -0.05   | 0.11    | 0.23    | -1.06   | 1.13    | -0.18   | 0.05    | 0.17    | 0.03    |
| N <sub>3</sub> C <sub>4</sub> C <sub>5</sub> N <sub>1</sub> | 0.77    | 1.02    | 1.03    | 1.44    | 0.68    | 1.11    | -1.20   | 1.75    | -1.94   | 0.03    | 1.05    | -1.26   | -1.02   |
| C <sub>4</sub> N <sub>3</sub> C <sub>2</sub> N <sub>1</sub> | -0.86   | -1.21   | -1.03   | -1.59   | -0.62   | -1.35   | 0.88    | -0.07   | 0.17    | 0.28    | -1.19   | 1.04    | 1.03    |
| RN <sub>1</sub> C <sub>2</sub> N <sub>3</sub>               | 175.87  | 174.04  | 174.48  | 164.00  | 174.97  | 168.35  | -173.68 | 173.87  | -172.22 | 179.39  | 169.16  | -173.06 | -176.13 |
| RN <sub>1</sub> C <sub>5</sub> C <sub>4</sub>               | -175.63 | -173.63 | -174.16 | -162.36 | -174.59 | -167.47 | 173.12  | -173.86 | 172.19  | -179.50 | -168.40 | 172.42  | 175.91  |
| O <sub>8</sub> N <sub>6</sub> C <sub>5</sub> N <sub>1</sub> | -3.43   | -3.22   | -3.21   | 14.33   | -1.93   | 1.95    | -4.77   | 3.71    | -2.53   | 1.69    | 1.96    | -7.63   | 4.69    |

Values of the bond lengths are given in angstroms (Å); dihedral angles are given in degrees (°). a) X-ray parameters were taken from Refs: a) [60]; b) [61].

Table S2. Condensed Fukui functions values for 2-nitroimidazoles and 5-nitroimidazoles at the M06-2X/6-311++G(2df,2p)// M06-2X/6-311+G(d,p) levels.<sup>a</sup>

| Mol. | $f^-$ |       |       |       | $f^+$ |       |       |       | $f^0$ |       |       |       |
|------|-------|-------|-------|-------|-------|-------|-------|-------|-------|-------|-------|-------|
|      | C5    | N3    | C4    | C2    | N3    | N6    | O7    | O8    | C5    | C4    | O7    | O8    |
| M-5  | 0.188 | 0.088 | 0.151 | 0.143 | 0.041 | 0.158 | 0.229 | 0.220 | 0.108 | 0.125 | 0.162 | 0.145 |
| M-1  | 0.203 | 0.072 | 0.202 | 0.134 | 0.074 | 0.168 | 0.246 | 0.237 | 0.136 | 0.127 | 0.158 | 0.153 |
| BNZ  | 0.001 | 0.001 | 0.001 | 0.001 | 0.073 | 0.164 | 0.245 | 0.212 | 0.034 | 0.048 | 0.123 | 0.106 |
| M-2  | 0.191 | 0.070 | 0.198 | 0.129 | 0.073 | 0.164 | 0.244 | 0.206 | 0.130 | 0.126 | 0.159 | 0.133 |
| M-6  | 0.019 | 0.054 | 0.094 | 0.087 | 0.045 | 0.155 | 0.227 | 0.204 | 0.055 | 0.094 | 0.136 | 0.123 |
| M-18 | 0.173 | 0.090 | 0.135 | 0.107 | 0.044 | 0.156 | 0.229 | 0.205 | 0.101 | 0.119 | 0.163 | 0.137 |
| M-16 | 0.168 | 0.090 | 0.135 | 0.107 | 0.046 | 0.159 | 0.233 | 0.209 | 0.097 | 0.118 | 0.166 | 0.139 |
| M-17 | 0.172 | 0.089 | 0.135 | 0.107 | 0.044 | 0.157 | 0.229 | 0.209 | 0.100 | 0.119 | 0.163 | 0.139 |
| M-21 | 0.163 | 0.087 | 0.136 | 0.107 | 0.045 | 0.159 | 0.234 | 0.200 | 0.094 | 0.118 | 0.165 | 0.133 |
| M-7  | 0.000 | 0.001 | 0.001 | 0.001 | 0.048 | 0.163 | 0.235 | 0.210 | 0.013 | 0.048 | 0.118 | 0.105 |
| M-19 | 0.169 | 0.088 | 0.135 | 0.107 | 0.047 | 0.159 | 0.232 | 0.184 | 0.098 | 0.118 | 0.166 | 0.124 |
| M-4  | 0.181 | 0.088 | 0.148 | 0.145 | 0.047 | 0.164 | 0.233 | 0.218 | 0.103 | 0.123 | 0.166 | 0.145 |
| M-3  | 0.183 | 0.091 | 0.151 | 0.156 | 0.047 | 0.165 | 0.235 | 0.231 | 0.107 | 0.124 | 0.167 | 0.154 |
| M-13 | 0.164 | 0.091 | 0.139 | 0.108 | 0.044 | 0.160 | 0.233 | 0.220 | 0.094 | 0.118 | 0.163 | 0.146 |
| M-10 | 0.165 | 0.087 | 0.136 | 0.110 | 0.049 | 0.160 | 0.231 | 0.206 | 0.096 | 0.118 | 0.165 | 0.139 |
| M-22 | 0.161 | 0.085 | 0.136 | 0.109 | 0.048 | 0.160 | 0.230 | 0.205 | 0.094 | 0.118 | 0.164 | 0.138 |
| M-11 | 0.163 | 0.086 | 0.136 | 0.110 | 0.049 | 0.160 | 0.230 | 0.207 | 0.095 | 0.118 | 0.164 | 0.139 |
| M-8  | 0.175 | 0.093 | 0.134 | 0.114 | 0.049 | 0.162 | 0.230 | 0.227 | 0.103 | 0.118 | 0.165 | 0.153 |
| M-20 | 0.003 | 0.008 | 0.008 | 0.002 | 0.047 | 0.161 | 0.229 | 0.209 | 0.013 | 0.054 | 0.118 | 0.107 |
| M-12 | 0.162 | 0.086 | 0.135 | 0.110 | 0.049 | 0.160 | 0.230 | 0.206 | 0.094 | 0.118 | 0.164 | 0.139 |
| M-15 | 0.167 | 0.086 | 0.134 | 0.109 | 0.048 | 0.160 | 0.228 | 0.209 | 0.095 | 0.117 | 0.165 | 0.141 |
| M-14 | 0.167 | 0.084 | 0.135 | 0.112 | 0.048 | 0.162 | 0.229 | 0.210 | 0.096 | 0.118 | 0.164 | 0.142 |
| M-9  | 0.162 | 0.085 | 0.137 | 0.112 | 0.049 | 0.162 | 0.230 | 0.217 | 0.095 | 0.118 | 0.163 | 0.146 |

Note: The values were order according to the highest value to the lowest value of the proton affinities (PA).
